# Supplementary material for: The Current State of Mobile Phone Apps for Monitoring Heart Rate, Heart Rate Variability, and Atrial Fibrillation: Narrative Review
Source: PubMed Central journal article supplement (PMC6396075; doi:10.2196/11606), 2019-02-15
Supplement: mhealth_v7i2e11606_app1.pdf [file mhealth_v7i2e11606_app1.pdf]

## **Multimedia Appendix 1. A flowchart outlining the search process of papers.**

### **PubMed -**

(‘mobile applications’ OR ‘smartphone’ OR ‘digital health’) AND (‘atrial fibrillation’ OR ‘heart rate’) – Total results (669)

### **Embase**

- 1: mobile application/
- 2: smartphone/
- 3: digital health.mp.
- 4: 1 OR 2 OR 3
- 5: atrial fibrillation/
- 6: heart rate/
- 7: 5 OR 6
- 8: 4 AND 7 – (total results: 337)
